# Supplementary material
Source: PubMed Central journal article supplement (PMC4959862)
Supplement: 10.1194_M068205_jlr.M068205-1.pdf [file 10.1194_M068205_jlr.M068205-1.pdf]

## **Supplementary materials to “Perilipin 3 interaction with model lipid monolayers”**

**Mona Mirheydari<sup>\*1</sup>, Sewwandi S. Rathnayake<sup>\*2</sup>, Hannah Frederick<sup>3</sup>, Taylor Arhar<sup>4</sup>, Elizabeth K. Mann<sup>1</sup>, Simon Cocklin<sup>5</sup>, and Edgar E. Kooijman<sup>2</sup>**

### **Affiliations:**

**<sup>1</sup>Physics department, Kent State University, Kent, OH 44242**

**<sup>2</sup>Department of Biological Sciences, Kent State University, Kent, OH 44242**

**<sup>3</sup>Department of Chemistry and Biochemistry, Kent State University, Kent, OH 44242**

**<sup>4</sup>Department of Chemistry and Biochemistry, Loyola Marymount University, 1 LMU Drive, Los Angeles, CA 90045**

**<sup>5</sup>Department of Biochemistry and Molecular Biology, Drexel University College of Medicine, Philadelphia, PA 19102**

**Key words: amphipathic alpha-helices; lipid droplets; protein-lipid interaction;**

**\*Contributed equally to this work.**

## Supplementary Figure S1

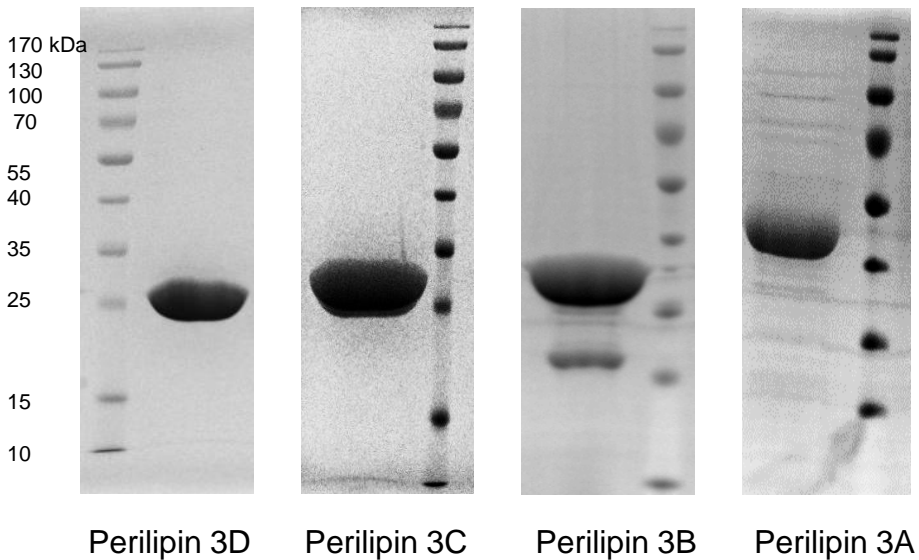

Our monolayer experiments require large quantities of highly pure protein. Figure S1 shows representative results for the expression and purification of the 4 constructs of perlipin 3 used in this work. The amphipathic  $\alpha$ -helix bundle of perlipin 3 (perilipin 3D), and truncation mutant perlipin 3C could be purified to at least 99% purity. Perilipin 3A (full length protein) was at least 95% pure, but perlipin 3B was more difficult to purify and had a final purity of ~85%. Purity estimation is based on gel staining.

Insertion Kinetics curves for each of the protein constructs are shown separately (Figures S2-S6).

### Supplementary Figure S2

Representative insertion kinetics for perilipin 3D

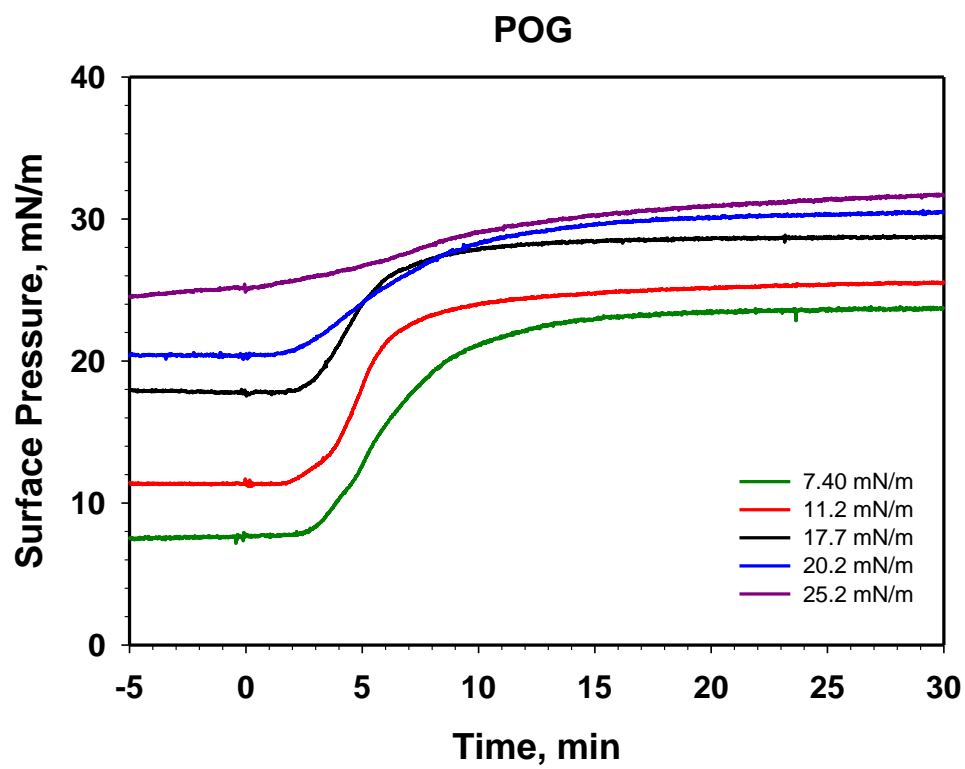

### POPA

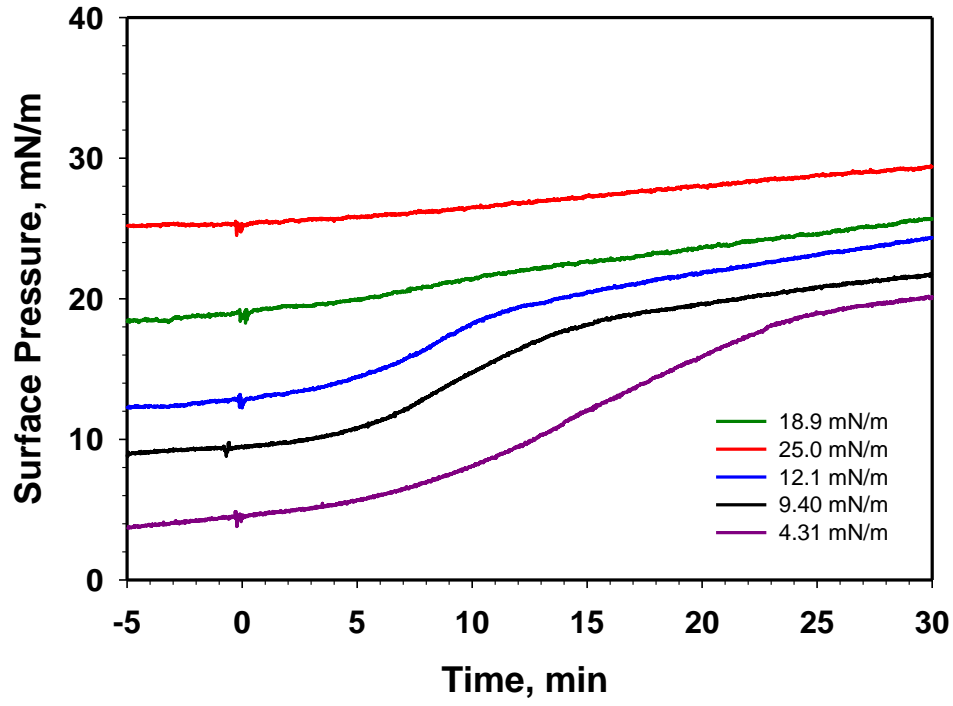

### POPC

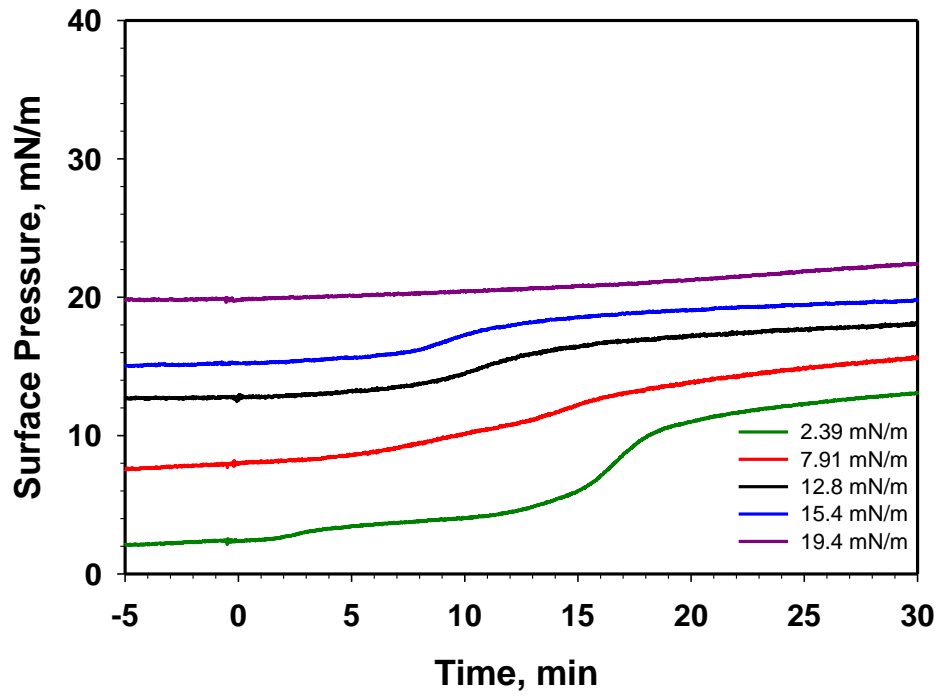

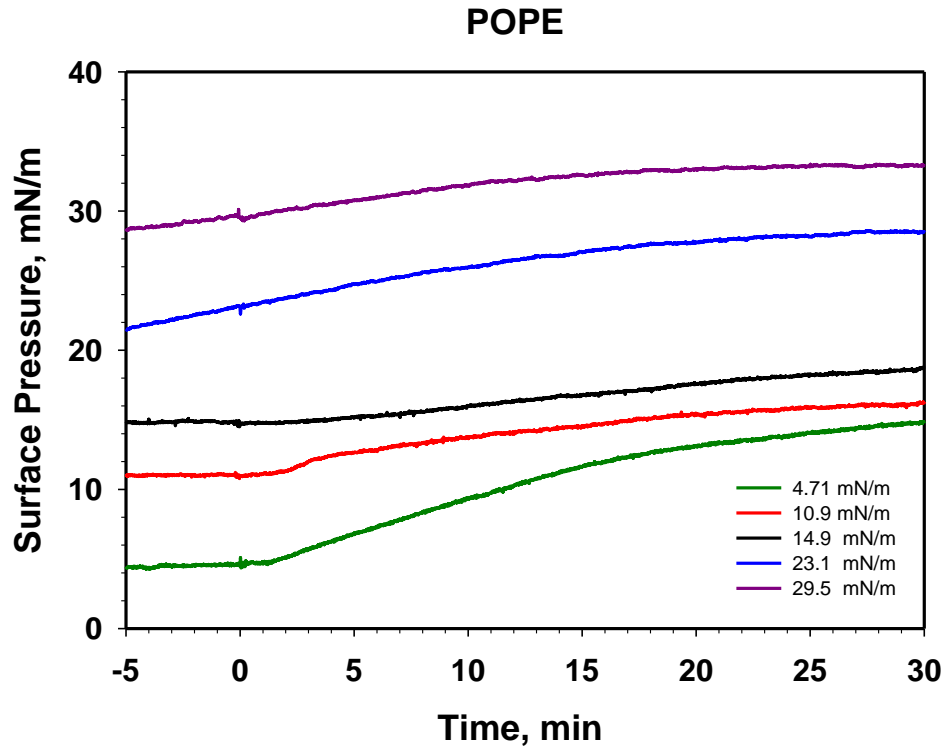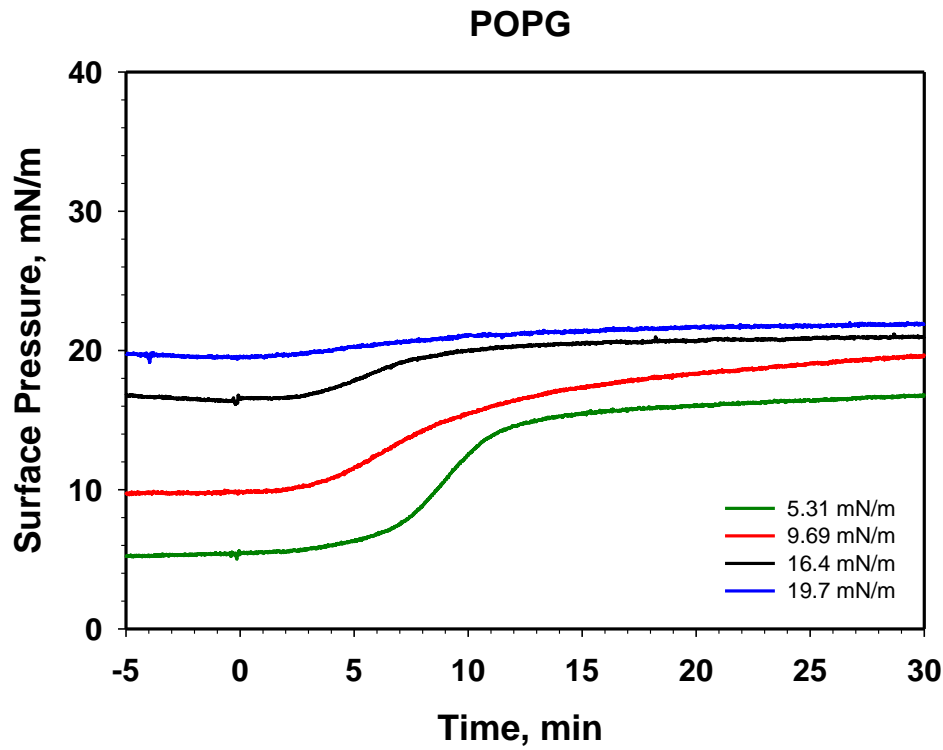

### Supplementary Figure S3

Representative insertion kinetics for perilipin 3C

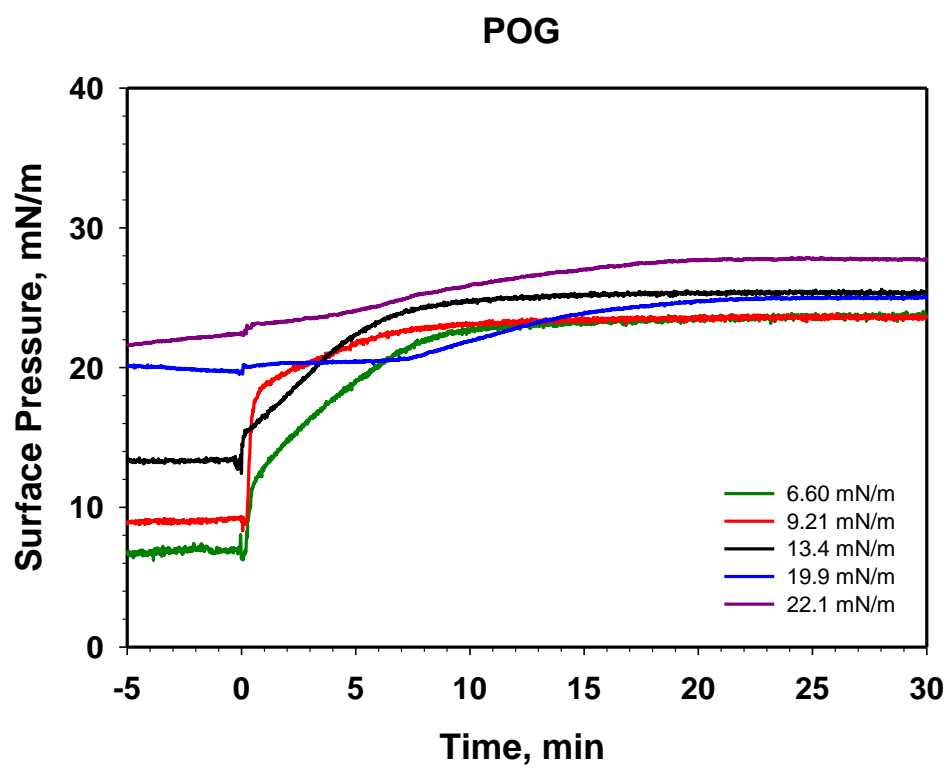

### POPA

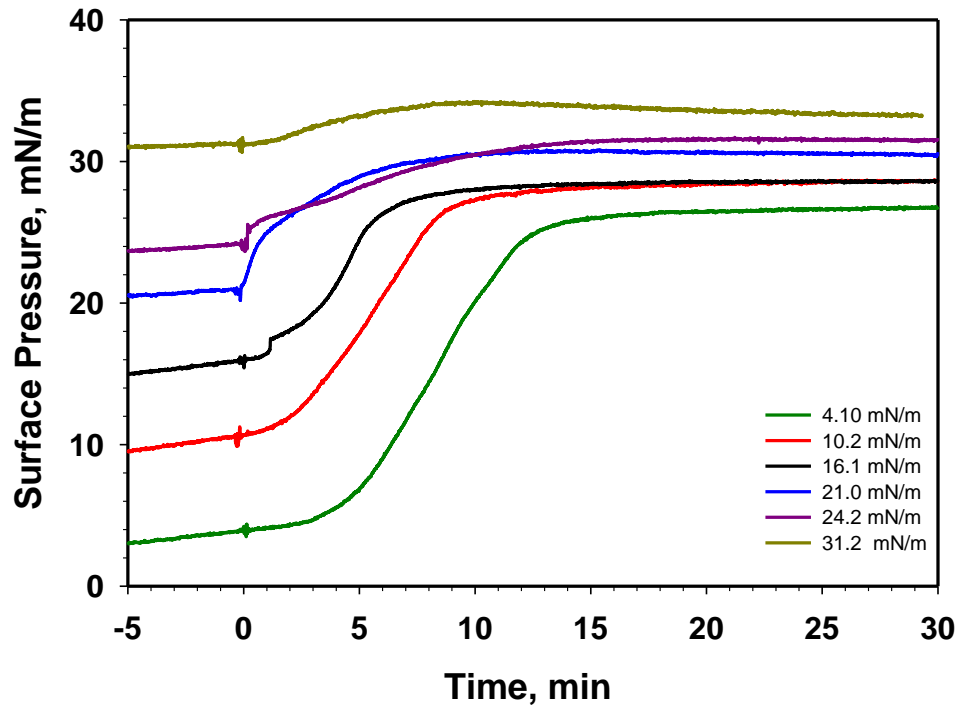

### POPC

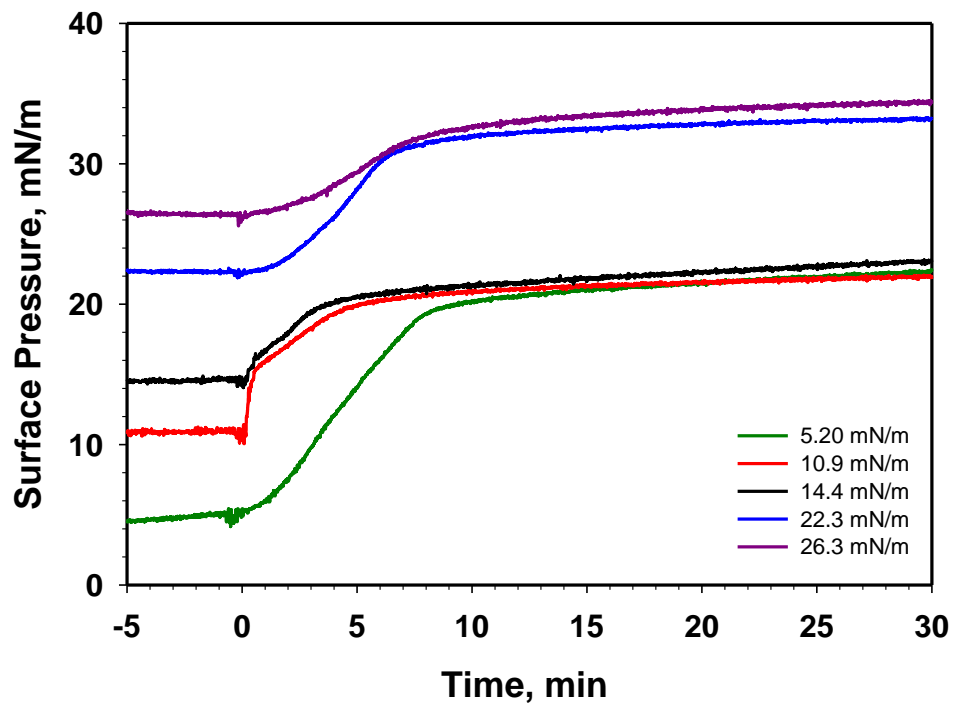

### POPE

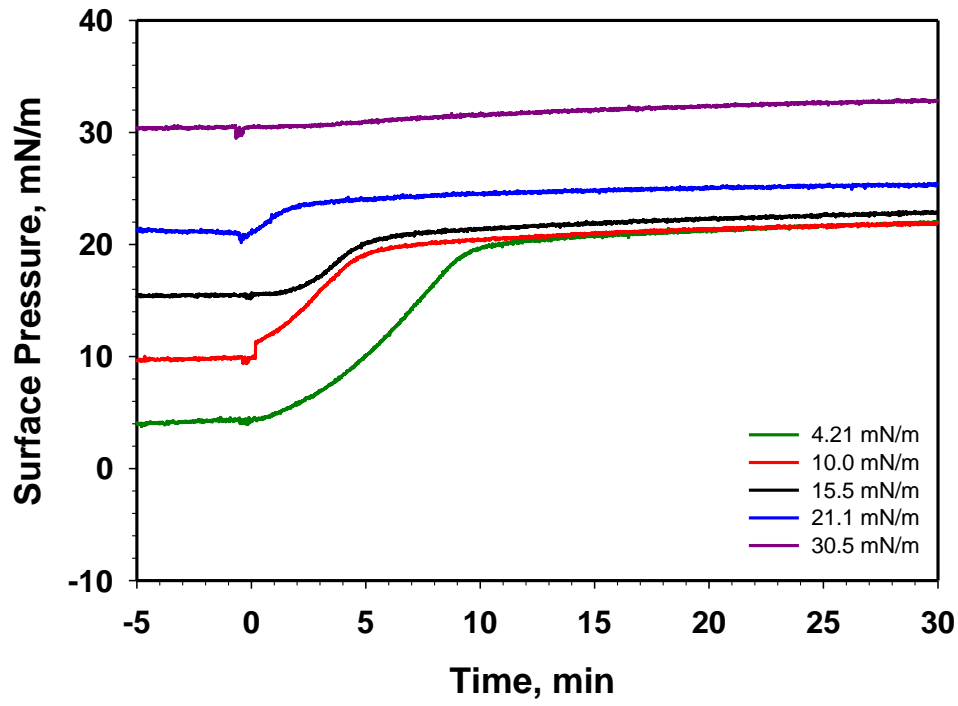

### POPG

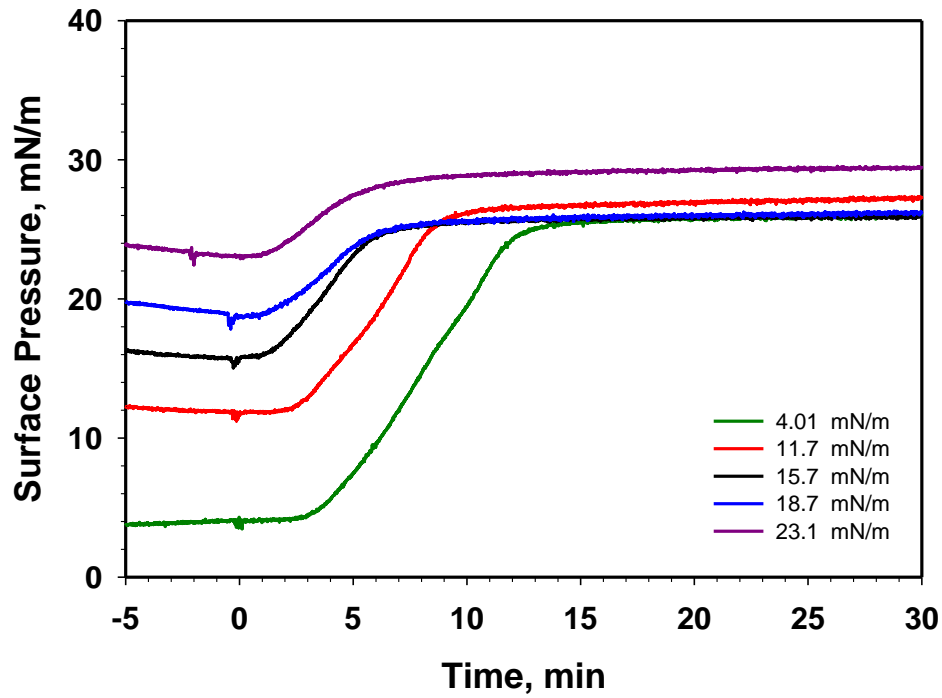



### Supplementary Figure S4

Representative insertion kinetics for perilipin 3B

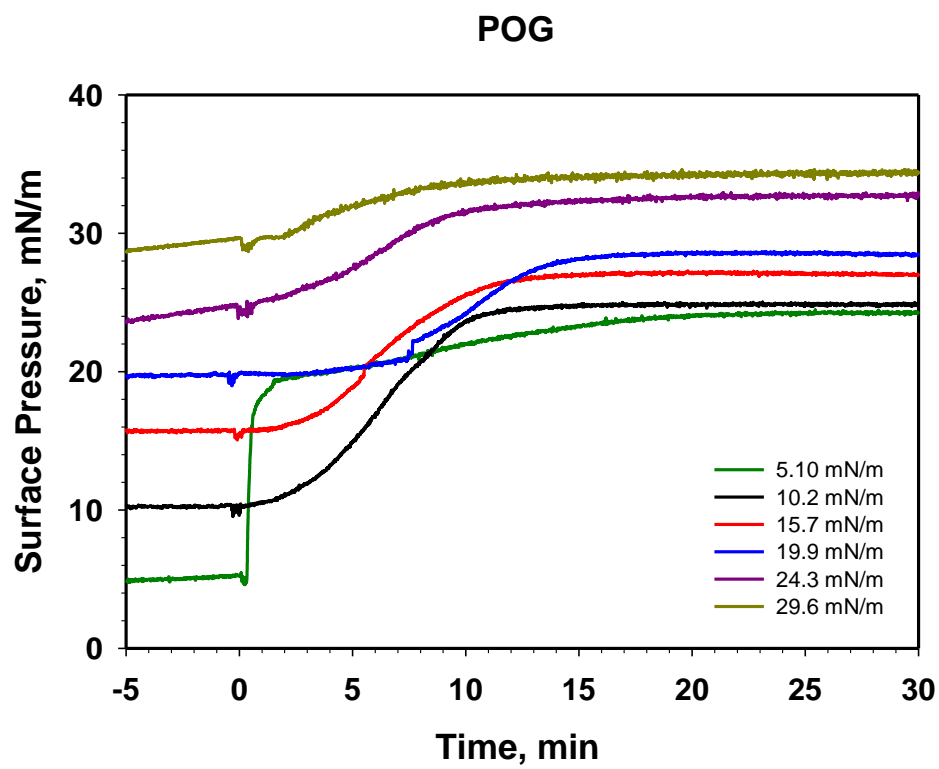

### POPA

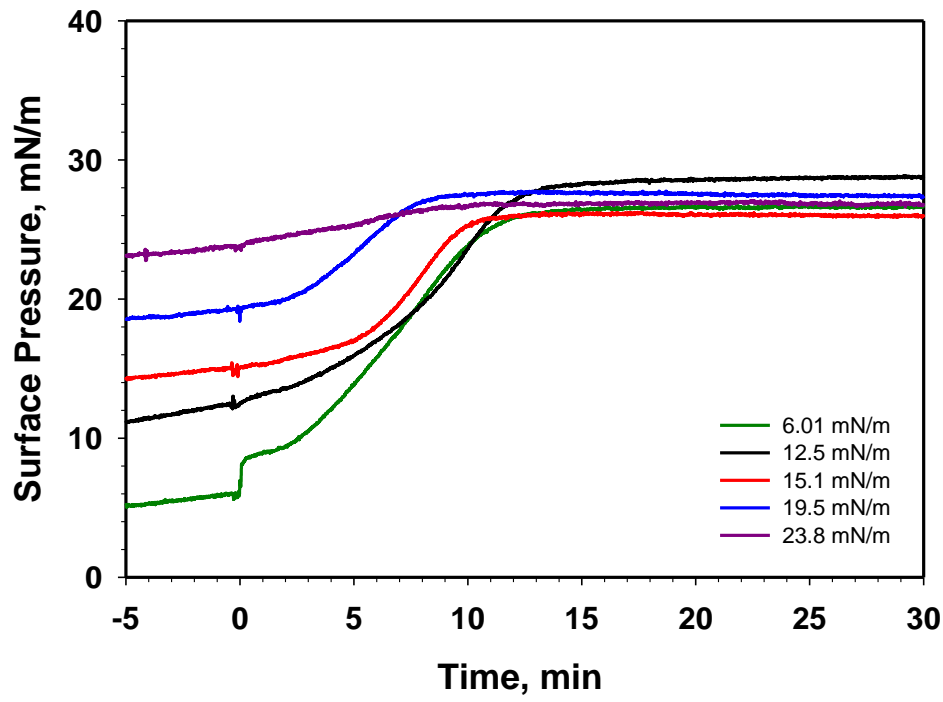

### POPC

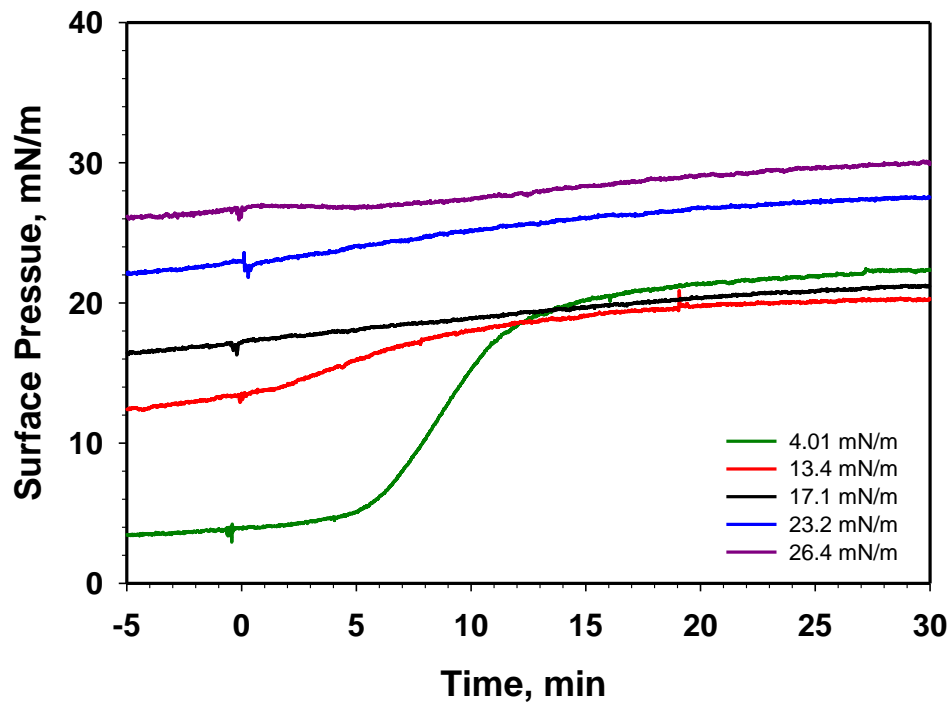

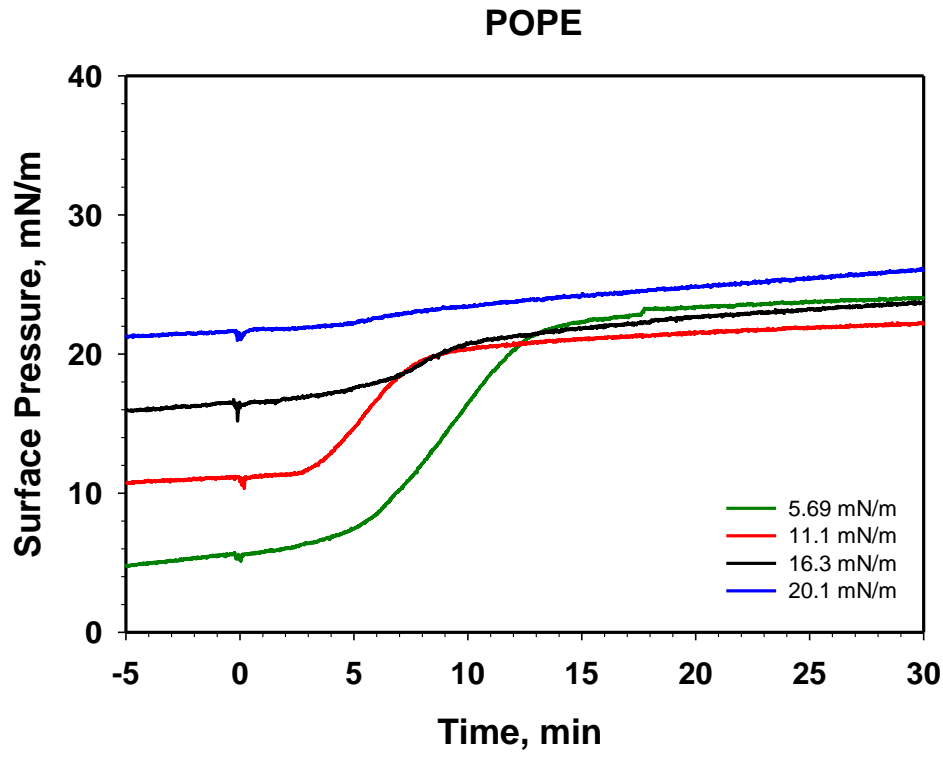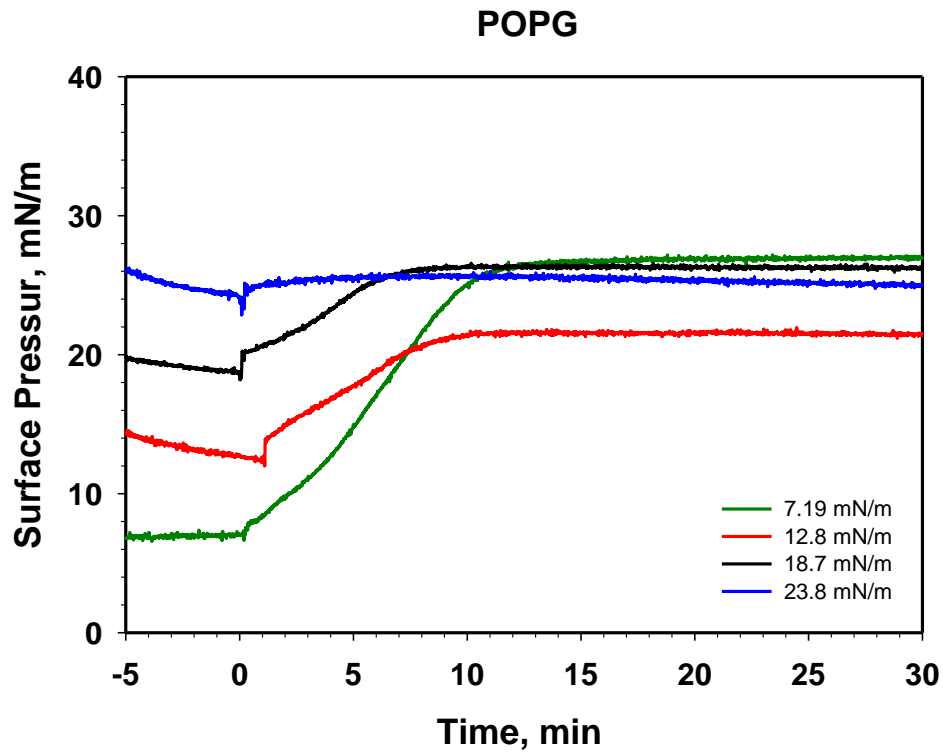

### Supplementary Figure S5

Representative insertion kinetics for perilipin 3A-Full length protein

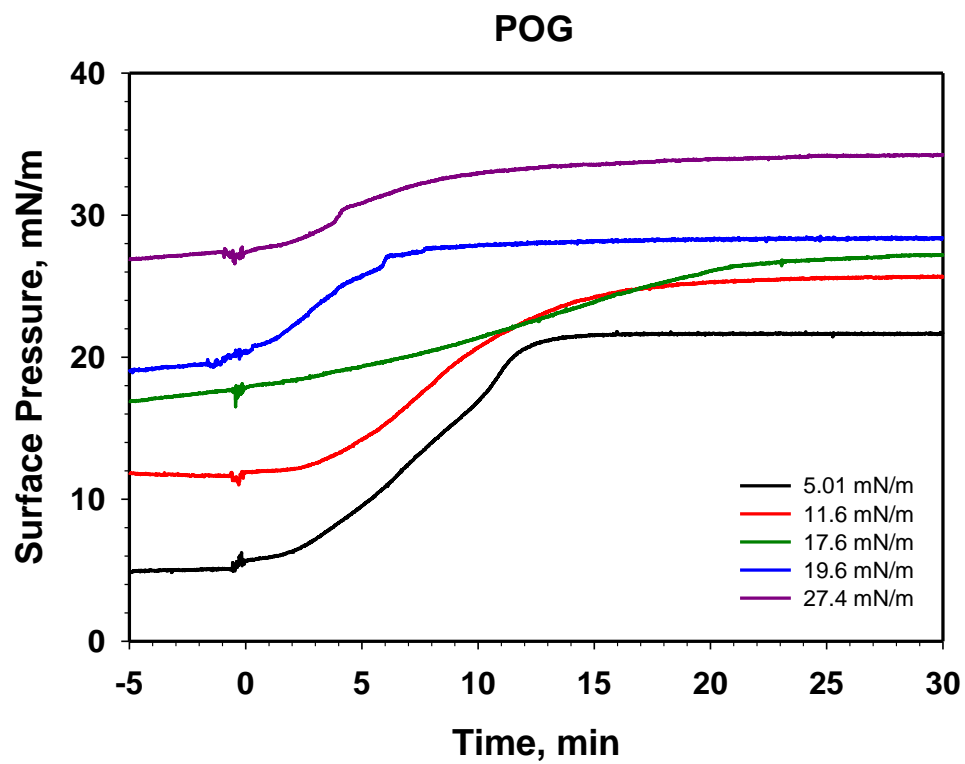

### POPA

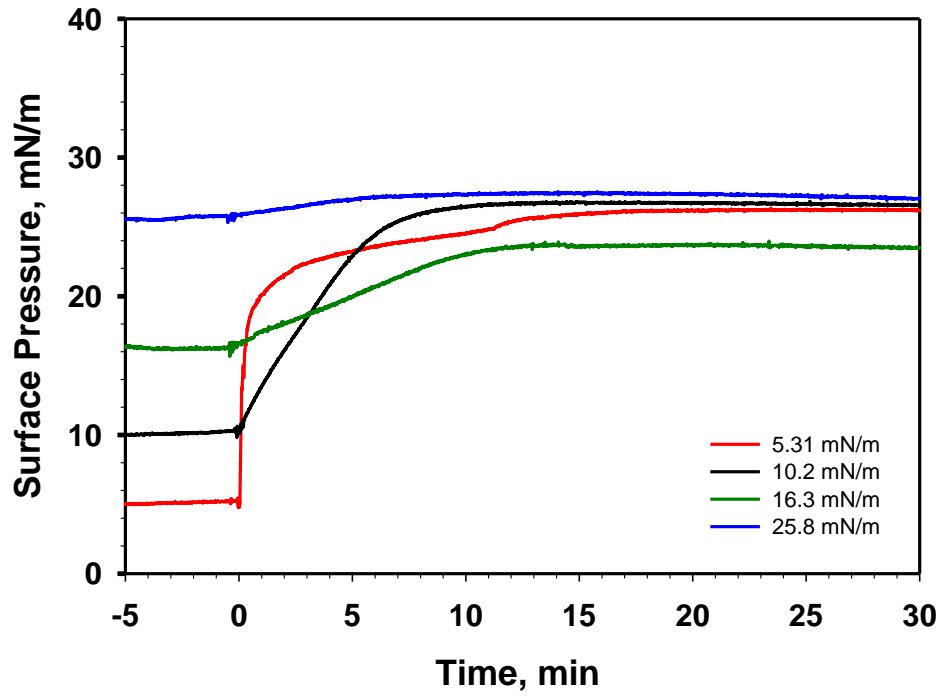

### POPC

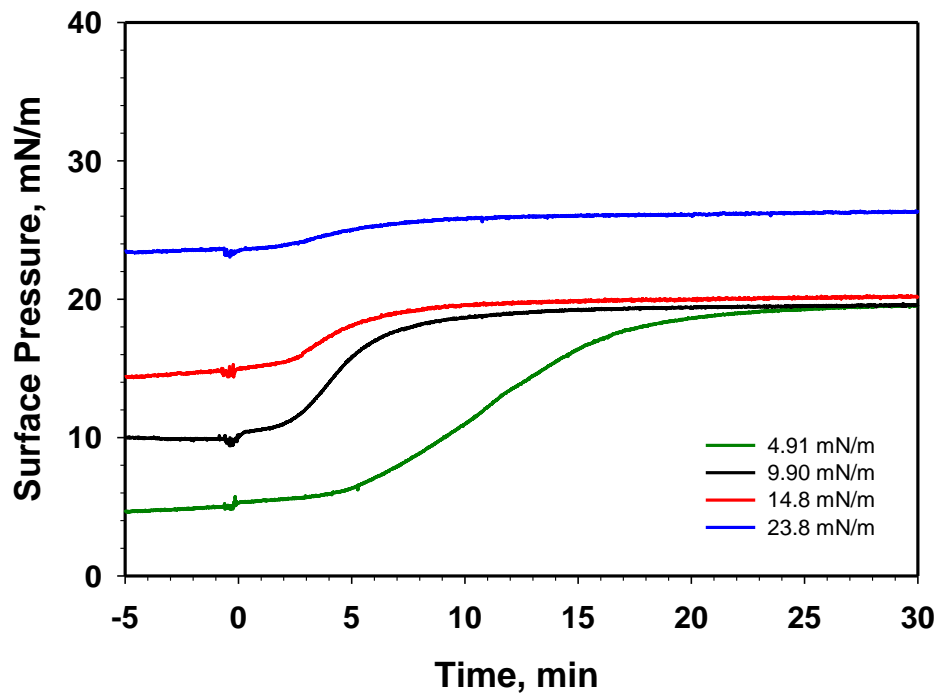

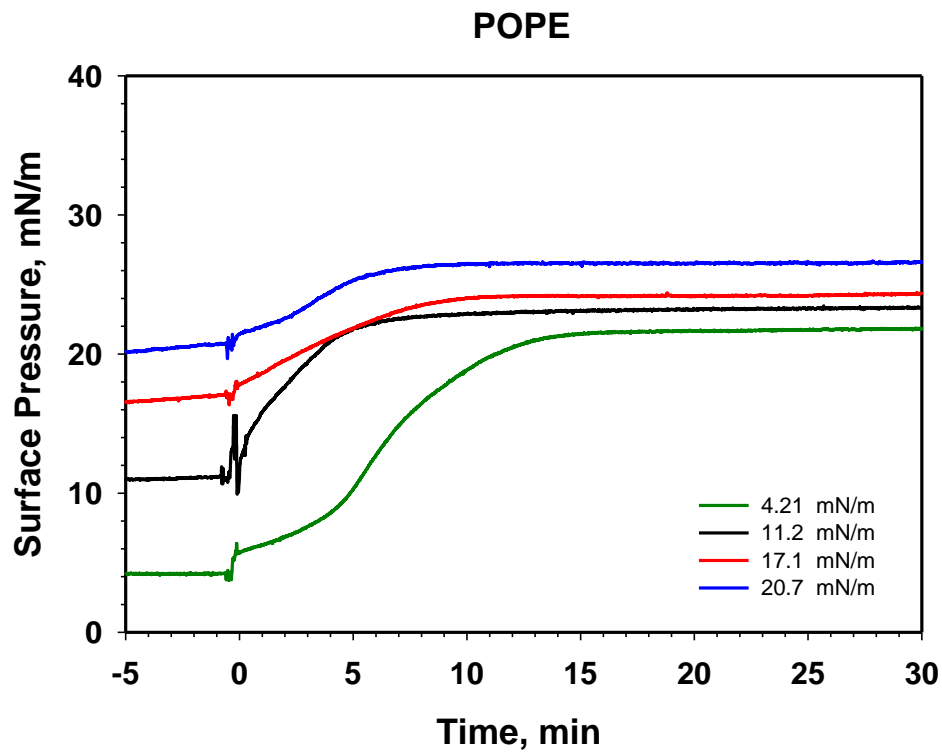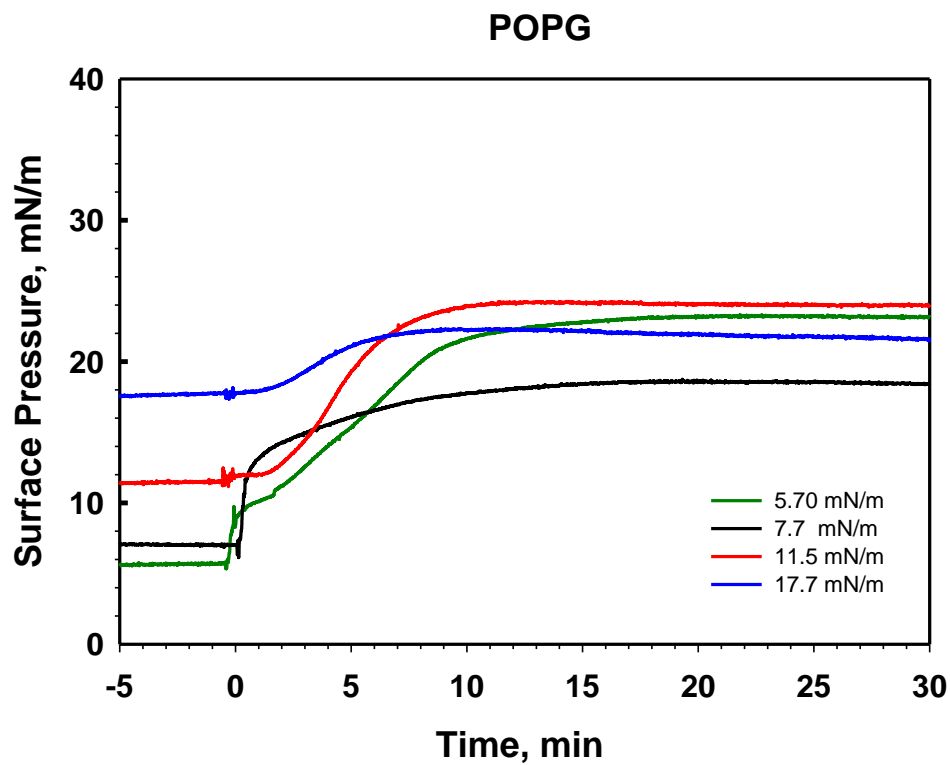

### Supplementary Figure S6

Representative insertion kinetics for perilipin 3D and three unsaturated lipids

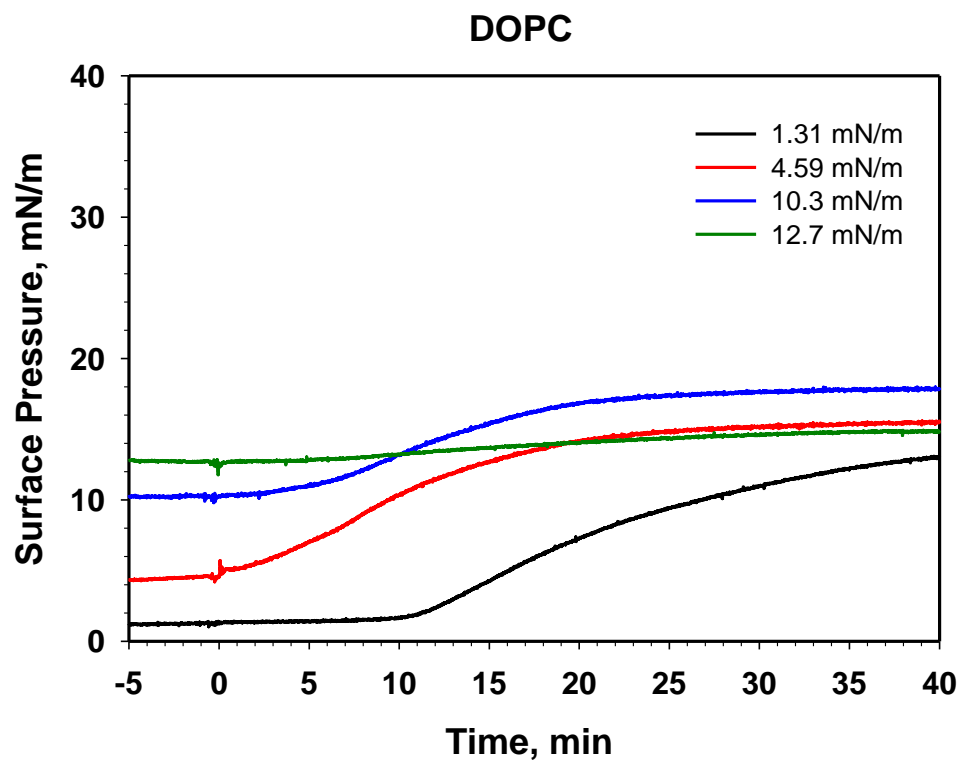

### DOPA

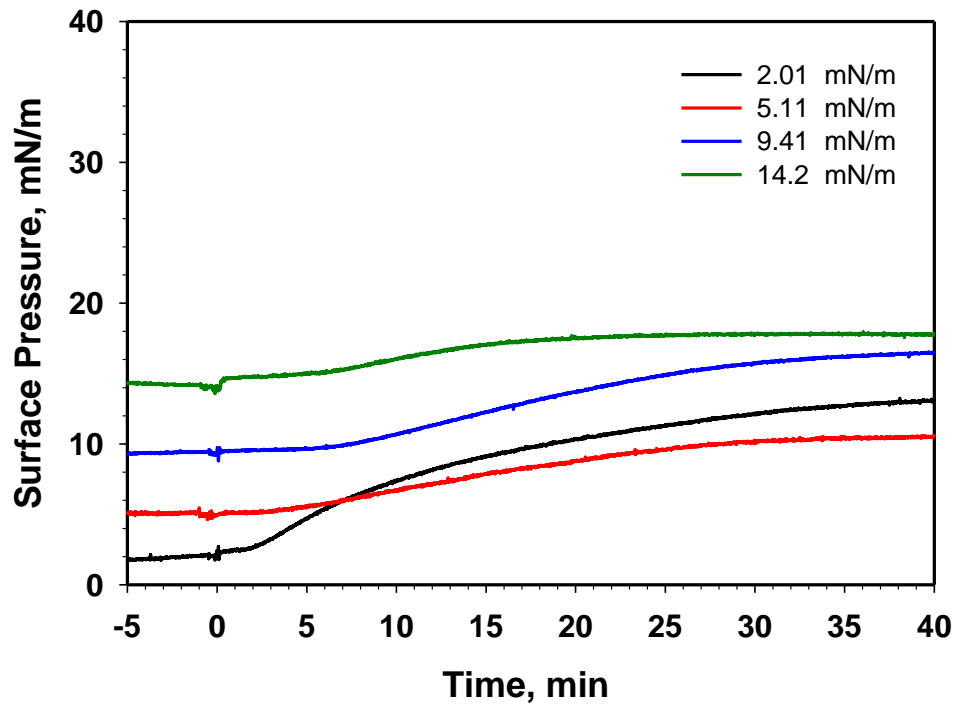

### DOPE

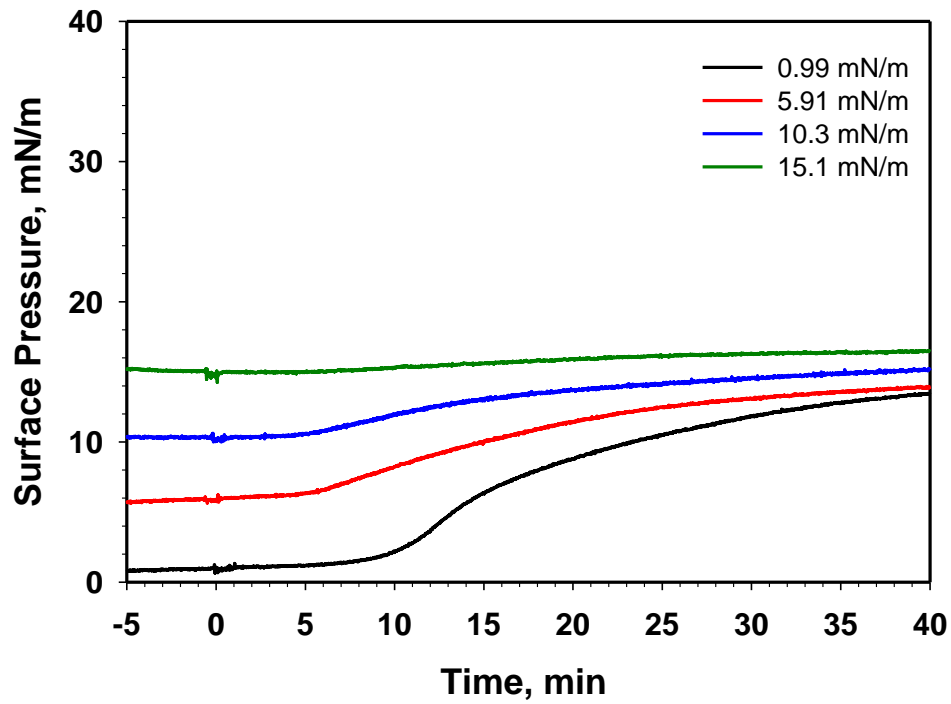



**Supplementary Figure S7**

Helical wheel representation of the 11-mer like repeat region of perilipin 3

**73 AAVSGAQPILSKLEPQIASASEYHRGLDKLEE<sup>105</sup>**

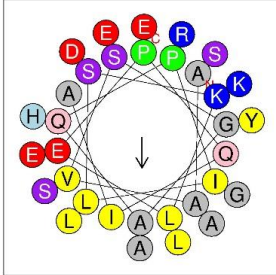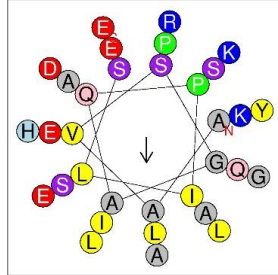

| Type | Hydrophobicity | Hydrophobic moment | Net charge |
|------|----------------|--------------------|------------|
| α    | 0.275          | 0.356              | -2         |
| 3/11 | 0.275          | 0.339              | -2         |

**106 NLPILQQPTEKVLADTKELVSSKVSQAQEMVSS 138**

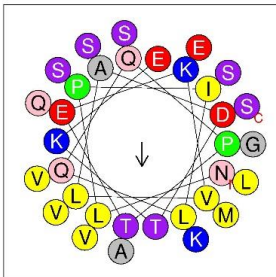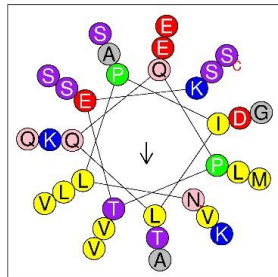

| Type | Hydrophobicity | Hydrophobic moment | Net charge |
|------|----------------|--------------------|------------|
| α    | 0.308          | 0.279              | -1         |
| 3/11 | 0.308          | 0.286              | -1         |

**139 AKDTVATQLSEAVDATRGAVQSGVDKTKSVVT 171**

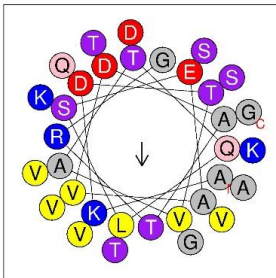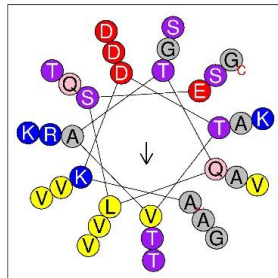

| Type | Hydrophobicity | Hydrophobic moment | Net charge |
|------|----------------|--------------------|------------|
| 0    |                |                    |            |
| α    | 0.133          | 0.274              | 0          |
| 3/11 | 0.133          | 0.296              | 0          |

**172 GVQSVMGSR LGQMVL SGVDTVLGKSEEWADNHL 204**

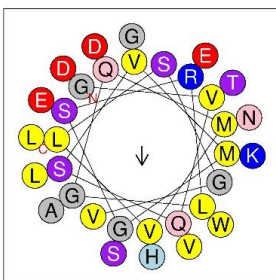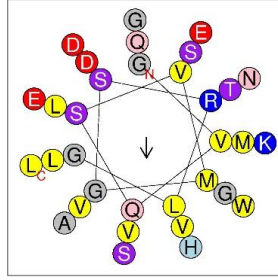

| Type | Hydrophobicity | Hydrophobic moment | Net charge |
|------|----------------|--------------------|------------|
| α    | 0.372          | 0.219              | -2         |
| 3/11 | 0.372          | 0.276              | -2         |
